# Supplementary material
Source: publisher figshare collection journal article supplement (https://tandf.figshare.com/articles/dataset/_/9938264)
Supplement: Supplementary file 1 [file 1]

Table 1. Physicochemical characteristics of GNPs, RES-trans-GNPs and RES-nanoemulsion-GNPs.

| Formulation           | Size (nm) | PDI        | Zeta potential(mV) | %RES content | % Permeated |
|-----------------------|-----------|------------|--------------------|--------------|-------------|
| GNPs                  | 10.30±2.4 | 0.130±0.05 | -15±1.4            | -            | -           |
| RES-trans-GNPs        | 94.93±5.6 | 0.194±0.08 | -28.7±4.7          | 69.53±3.82   | 81.29±2.64  |
| RES-nanoemulsion-GNPs | 20.36±4.3 | 0.26±0.04  | -18±2.6            | 95.72±5.34   | 54.64±2.75  |

Table 2. Ex vivo permeation parameters of RES-trans-GNPs and RES-nanoemulsion-GNPs versus pure RES-suspension.

| Formulation           | Flux (Jss)<br>( $\mu\text{g cm}^{-2} \text{ hr}^{-1}$ ) | Permeation coefficient<br>( $\text{cm hr}^{-1}$ ) |
|-----------------------|---------------------------------------------------------|---------------------------------------------------|
| Pure RES-suspension   | 0.240633748                                             | 0.00024                                           |
| RES-trans-GNPs        | 0.406187108                                             | 0.00040                                           |
| RES-nanoemulsion-GNPs | 0.368063694                                             | 0.00036                                           |
